# Supplementary material
Source: publisher figshare collection journal article supplement (https://aacr.figshare.com/articles/dataset/_/22482561)

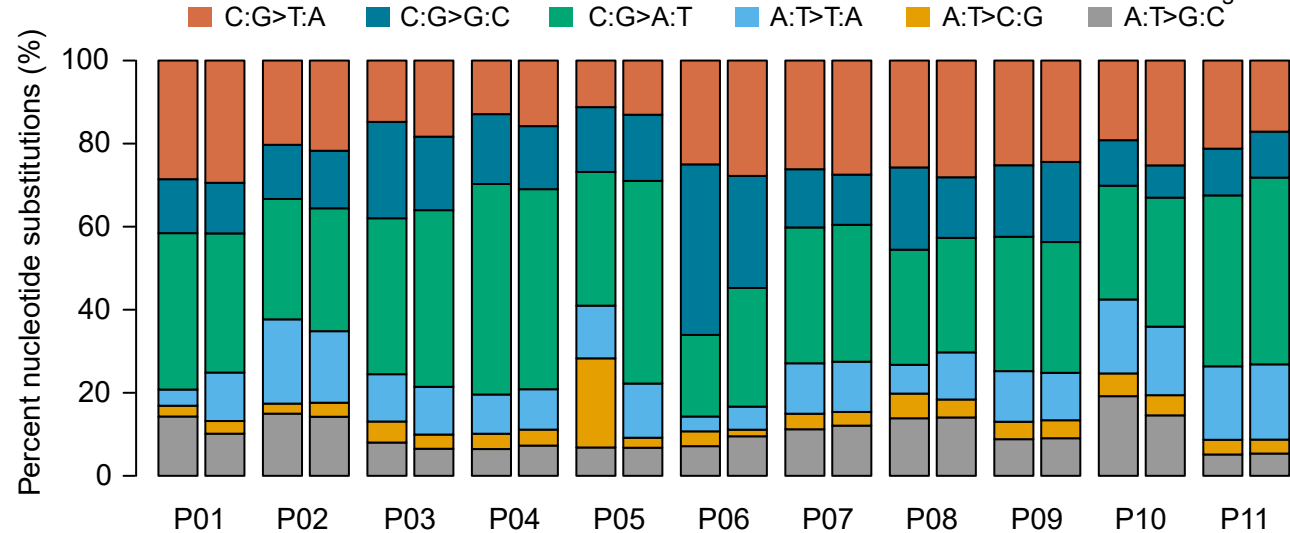

Supplement: Supplementary file 1 [file 39934083]
